# Supplementary material
Source: MDPI journal article supplement (https://www.mdpi.com/2073-4395/13/6/1636)
Supplement: s1 [file s1]

# Optimizing the Incorporated Amount of Chinese Milk Vetch (*Astragalus sinicus* L.) to Improve Rice Productivity without Increasing CH<sub>4</sub> and N<sub>2</sub>O Emissions

Nannan Zhou <sup>1</sup>, Tengfei Jiang <sup>1</sup>, Jiajia Wang <sup>2</sup>, Yujiao Chen <sup>1</sup>, Wenbin Yang <sup>1</sup>, Shan Tang <sup>2</sup>, Shang Han <sup>2</sup> and Ying Wang <sup>1,2,3,\*</sup>

<sup>1</sup> Collaborative Innovation Center of Recovery and Reconstruction of Degraded Ecosystem in Wanjiang Basin Co-Founded by Anhui Province and Ministry of Education, School of Ecology and Environment, Anhui Normal University, Wuhu 241002, China; nannanzh@ahnu.edu.cn (N.Z.); knightdanger81@gmail.com (T.J.); chsuofgtclcvyvd3@gmail.com (Y.C.); lykesfijhg651257@gmail.com (W.Y.)

<sup>2</sup> Anhui Provincial Key Laboratory of Nutrient Recycling, Resources and Environment, Institute of Soil and Fertilizer, Anhui Academy of Agricultural Sciences, Hefei 230031, China; ioyzrg4982459@gmail.com (J.W.); pqgwip532716@gmail.com (S.T.); dgytqnk184436414@gmail.com (S.H.)

<sup>3</sup> Anhui Laboratory of Molecule-Based Materials, Anhui Normal University, Wuhu 241002, China

\* Correspondence: wangying11@ahnu.edu.cn

## Supplemental Material

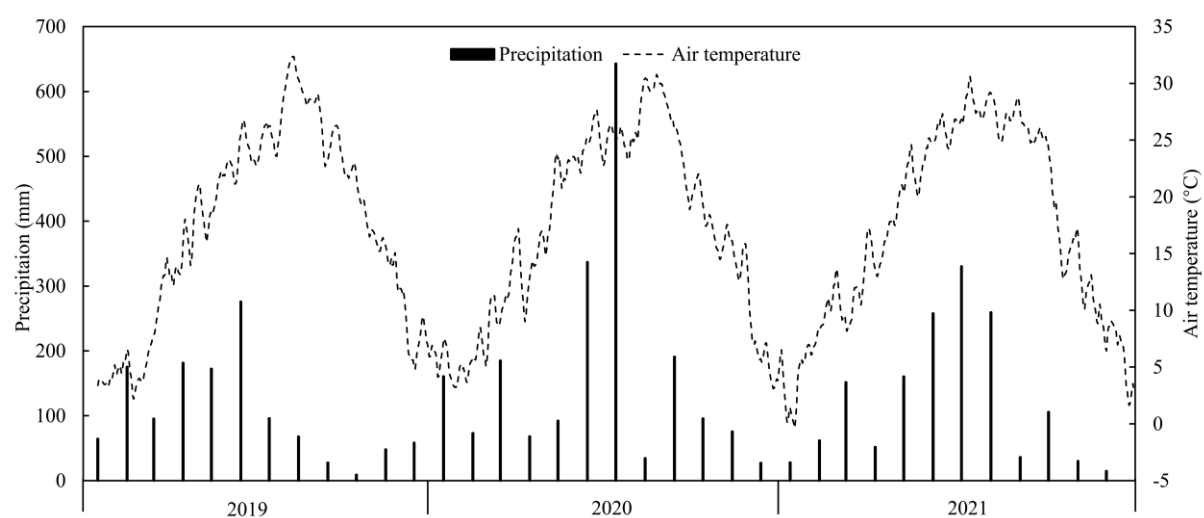

**Figure S1.** Monthly precipitation and daily ambient temperature during the experimental period. Daily ambient temperature data are 7-day moving averages.

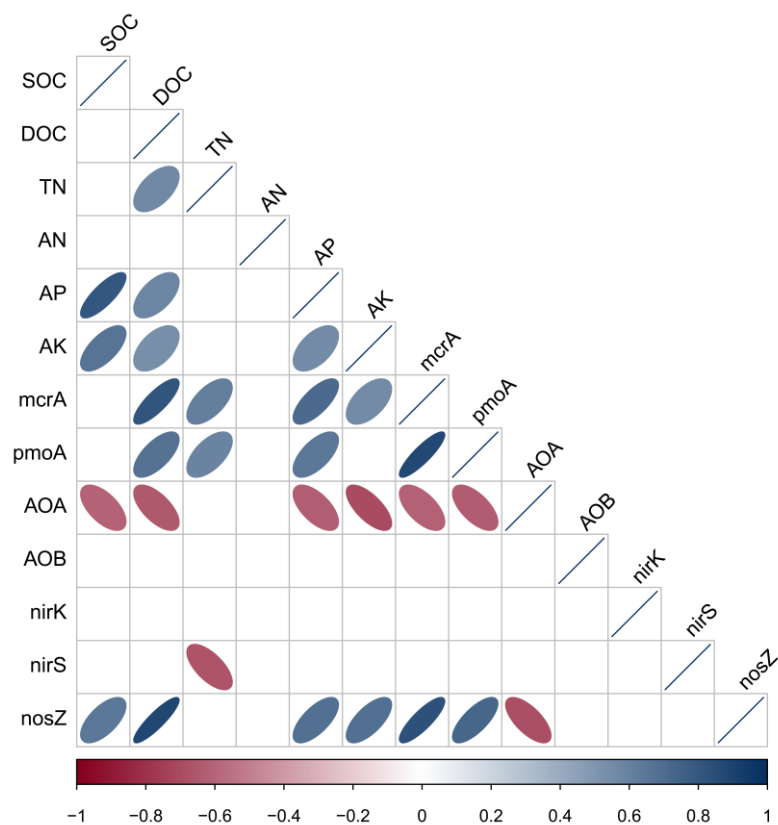

**Figure S2.** Pearson's correlations between the abundances of functional genes and soil nutrients. The blue and red ellipses denote significantly positive and negative correlations, respectively ( $n=15$ ,  $P < 0.05$ ). The color shades represent correlation coefficients ( $r$ ). SOC: soil organic carbon, DOC: dissolved organic carbon, TN: total nitrogen, AN: available nitrogen, AP: available phosphorus, AK: available potassium.

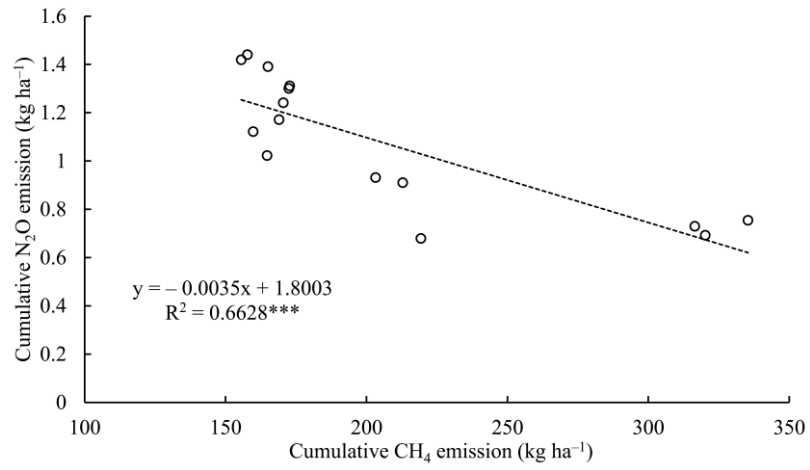

**Figure S3.** Trade-off correlation between cumulative CH<sub>4</sub> and N<sub>2</sub>O emission. \*\*\* significant at  $p < 0.001$
